# Supplementary material
Source: publisher figshare collection journal article supplement (https://sage.figshare.com/ndownloader/files/16320413)
Supplement: Supplementary file 1 [file 16320413]

## Appendix A: Scales

| Scale Name                                                                                 | Source                                                            | Items                                                                                                                                                                                                                                                                             | Multidisciplinary Cohort                                          | Single Disciplinary Cohort                                          |
|--------------------------------------------------------------------------------------------|-------------------------------------------------------------------|-----------------------------------------------------------------------------------------------------------------------------------------------------------------------------------------------------------------------------------------------------------------------------------|-------------------------------------------------------------------|---------------------------------------------------------------------|
| <b>Attitude Toward Leadership (ATEL)</b>                                                   | <b>Athayde, 2009</b>                                              | I enjoy talking the class round to my point of view                                                                                                                                                                                                                               | Scale decreases from T1 to T2. But the changes were insignificant | Scale increases from T1 to T2. But the changes were not significant |
|                                                                                            |                                                                   | I usually take the initiative on any project I'm involved in.                                                                                                                                                                                                                     |                                                                   |                                                                     |
|                                                                                            |                                                                   | I think I can easily carry my classmates with me when I have an idea.                                                                                                                                                                                                             |                                                                   |                                                                     |
|                                                                                            |                                                                   | I enjoy talking responsibility for things in the classroom.                                                                                                                                                                                                                       |                                                                   |                                                                     |
|                                                                                            |                                                                   | I like taking the lead in projects at school                                                                                                                                                                                                                                      |                                                                   |                                                                     |
| <b>Attitude Toward Creativity (ATEC)</b>                                                   | <b>Athayde, 2009</b>                                              | When we do a school project I'm right there at the centre of things.                                                                                                                                                                                                              | Scale decreases from T1 to T2. The changes were significant       | Scale decreases from T1 to T2. The changes were insignificant       |
|                                                                                            |                                                                   | I believe that a good imagination helps you do well at school.                                                                                                                                                                                                                    |                                                                   |                                                                     |
|                                                                                            |                                                                   | I enjoy lessons where the teacher tries out different ways of teaching.                                                                                                                                                                                                           |                                                                   |                                                                     |
|                                                                                            |                                                                   | Being creative is an advantage in lessons                                                                                                                                                                                                                                         |                                                                   |                                                                     |
| <b>Perceived Similarity (SIM)</b>                                                          | <b>Developed</b>                                                  | I like lessons that really stretch my imagination                                                                                                                                                                                                                                 | Scale decreases from T1 to T2. But the changes were insignificant | Scale increases from T1 to T2. The changes were insignificant       |
|                                                                                            |                                                                   | In general, my personality is similar to the personality of the student(s) from my own my team                                                                                                                                                                                    |                                                                   |                                                                     |
|                                                                                            |                                                                   | In general, my work habits are similar to the work habits of the student(s) from the other                                                                                                                                                                                        |                                                                   |                                                                     |
|                                                                                            |                                                                   | In general, the student(s) from my own discipline who are on my team are a lot like me.                                                                                                                                                                                           |                                                                   |                                                                     |
|                                                                                            |                                                                   | In general, my personality is similar to the personality of the student(s) from the other discipline from my team                                                                                                                                                                 |                                                                   |                                                                     |
|                                                                                            |                                                                   | In general, my work habits are similar to the work habits of the student(s) from my own discipline on my team                                                                                                                                                                     |                                                                   |                                                                     |
| In general the student(s) from the other discipline who are on my team are a lot like me.  |                                                                   |                                                                                                                                                                                                                                                                                   |                                                                   |                                                                     |
| <b>Multidisciplinary Experiential Learning (MDIS)</b>                                      | <b>Developed</b>                                                  | Working with a multi-disciplinary team helps to define problems                                                                                                                                                                                                                   | Scale decreases from T1 to T2. The changes were significant       | Scale was not included in single discipline cohort study            |
|                                                                                            |                                                                   | Working with a multi-disciplinary team helps to produce solutions                                                                                                                                                                                                                 |                                                                   |                                                                     |
| <b>Perceived Organizational Valuing of Creativity (POVC)</b>                               | <b>Adapted from Farmer et al. (2003)</b>                          | The University is very supportive of creative work.                                                                                                                                                                                                                               | Scale increases from T1 to T2. But the changes were insignificant | Scale decreases from T1 to T2. The changes were insignificant       |
|                                                                                            |                                                                   | I feel creativity is supported and encouraged at the University.                                                                                                                                                                                                                  |                                                                   |                                                                     |
|                                                                                            |                                                                   | New ideas or concepts are fostered at the University.                                                                                                                                                                                                                             |                                                                   |                                                                     |
|                                                                                            |                                                                   | My professors at the University generally value creative work.                                                                                                                                                                                                                    |                                                                   |                                                                     |
| <b>Challenge (CH)</b>                                                                      | <b>Developed</b>                                                  | how much you expect you will experience challenge in understanding the problem, market base, developing design specs, ideation and product/component design, fabrication, planning, management concepts, ambiguity, team work, time management, lean startup, customer interviews | Scale increases from T1 to T2. But the changes were insignificant | Scale increases from T1 to T2. The changes were significant         |
| <b>Interest in Entrepreneurship (T1)</b>                                                   | <b>Ontario Ministry of Economic Development and Growth (2014)</b> | Before participating in this project, how would you describe your interest in entrepreneurship                                                                                                                                                                                    | Scale increases from T1 to T2. The changes were significant       | Scale increases from T1 to T2. The changes were significant         |
| <b>Interest in Entrepreneurship (T2)</b>                                                   | <b>Ontario Ministry of Economic Development and Growth (2014)</b> | After participating in this project my interest in entrepreneurship has                                                                                                                                                                                                           |                                                                   |                                                                     |
|                                                                                            |                                                                   | After participating in this project my awareness of entrepreneurship in Ontario has                                                                                                                                                                                               |                                                                   |                                                                     |
|                                                                                            |                                                                   | After participating in this project my knowledge of entrepreneurship concepts has                                                                                                                                                                                                 |                                                                   |                                                                     |
|                                                                                            |                                                                   | After participating in this project my entrepreneurship skills have                                                                                                                                                                                                               |                                                                   |                                                                     |
|                                                                                            |                                                                   | After participating in this project my interest in entrepreneurship as an area of study has                                                                                                                                                                                       |                                                                   |                                                                     |
| After participating in this project my interest in entrepreneurship as a career choice has |                                                                   |                                                                                                                                                                                                                                                                                   |                                                                   |                                                                     |

Appendix B: Scales: Cronbach's Alpha, Mean and Standard Deviation

| Scale Name                                            | Multidisciplinary Cohort |                         |            |             |          |           | Single Disciplinary Cohort |                         |            |             |          |           |
|-------------------------------------------------------|--------------------------|-------------------------|------------|-------------|----------|-----------|----------------------------|-------------------------|------------|-------------|----------|-----------|
|                                                       | Cronbach's Alpha (Pre)   | Cronbach's Alpha (Post) | Mean (Pre) | Mean (Post) | SD (Pre) | SD (Post) | Cronbach's Alpha (Pre)     | Cronbach's Alpha (Post) | Mean (Pre) | Mean (Post) | SD (Pre) | SD (Post) |
| Attitude Toward Leadership (ATEL)                     | 0.792                    | 0.887                   | 21.362     | 20.734      | 3.743    | 4.821     | 0.762                      | 0.858                   | 20.364     | 20.714      | 3.719    | 4.719     |
| Attitude Toward Creativity (ATEC)                     | 0.779                    | 0.843                   | 15.252     | 14.34       | 3.163    | 3.547     | 0.828                      | 0.894                   | 15.0685    | 14.5113     | 3.465    | 4.02      |
| Perceived Similarity (SIM)                            | 0.773                    | 0.836                   | 18.926     | 18.823      | 3.404    | 4.339     | 0.685                      | 0.782                   | 9.198      | 9.43        | 2.058    | 2.651     |
| Multidisciplinary Experiential Learning (MDIS)        | 0.73                     | 0.84                    | 7.553      | 7.192       | 1.595    | 1.87      | N/A                        | N/A                     | N/A        | N/A         | N/A      | N/A       |
| Perceived Organizational Valuing of Creativity (POVC) | 0.863                    | 0.847                   | 13.308     | 13.311      | 3.226    | 3.095     | 0.827                      | 0.902                   | 13.559     | 13.2        | 2.942    | 3.562     |
| Challenge (CH)                                        | 0.876                    | 0.904                   | 41.659     | 42.901      | 8.112    | 8.649     | 0.861                      | 0.881                   | 31.789     | 30.085      | 7.52     | 8.157     |
| Interest in Entrepreneurship (InEn)                   | N/A                      | 0.865                   | N/A        | 21.627      | N/A      | 3.854     | N/A                        | 0.858                   | N/A        | 13.853      | N/A      | 3.521     |
